# Supplementary material for: Carbon steel corrosion by bacteria from failed seal rings at an offshore facility
Source: PubMed Central journal article supplement (PMC7378185; doi:10.1038/s41598-020-69292-5), 2020-07-23
Supplement: 41598_2020_69292_MOESM1_ESM.pdf [file 41598_2020_69292_MOESM1_ESM.pdf]

# Supplementary Material

## Carbon Steel Corrosion by Bacteria from Failed Seal Rings at an Offshore Facility

Silvia J. Salgar-Chaparro<sup>a</sup>, Adam Darwin<sup>b</sup>, Anna H. Kaksonen<sup>c</sup>, Laura L. Machuca<sup>a\*</sup>

<sup>a</sup> Curtin Corrosion Centre, WA School of Mines: Minerals, Energy and Chemical Engineering, Curtin University, Kent Street, Bentley, WA 6102, Australia

<sup>b</sup> Woodside Energy Ltd., Perth, 6000 WA, Australia

<sup>c</sup> Commonwealth Scientific and Industrial Research Organization (CSIRO), Land and Water, 147 Underwood Avenue, Floreat WA 6014, Australia

### \* Correspondence:

Laura L. Machuca

[l.machuca2@curtin.edu.au](mailto:l.machuca2@curtin.edu.au)

### Content

**Table S1.** Microbial community composition in failed seal rings based on partial 16S rRNA gene sequencing

**Table S2.** Morphological characterisation of bacteria isolated from corroded seal rings

**Table S3.** Weight loss of coupons exposed to abiotic and biotic conditions for 7 days.

**Table S4.** *p*-value calculated from the Kruskal-Wallis test applied to evaluate differences in the corrosion rates and pit depths among coupons exposed to the isolated bacteria and the control for 7 days.

**Table S5.** Classification of corrosion rates triggered by isolated bacteria

**Table S6.** Weight loss of coupons exposed to abiotic and biotic conditions for 21 days.

**Table S7.** *p*-value calculated from the Kruskal-Wallis test applied to evaluate differences in the corrosion rates and pit depths among coupons exposed to the isolated bacteria and the control for 21 days.

**Fig S1.** Images of the carbon steel coupons exposed for 7 days to the bacteria isolated from corroded seal rings.

**Figure S2.** Test solution pH (A) and planktonic cell numbers (B) during the long term study. Replenishment of media is indicated by the dashed line.

**Table S1.** Microbial community composition in failed seal rings based on partial 16S rRNA gene sequencing

| Taxa                                  | Relative abundance (%) |       |       |
|---------------------------------------|------------------------|-------|-------|
|                                       | S1                     | S2    | S3    |
| <b><u>Actinobacteria</u></b>          |                        |       |       |
| <i>Micrococcus</i>                    | 0.01                   |       |       |
| <b><u>Bacteroidetes</u></b>           |                        |       |       |
| <i>Marinifilum</i>                    | 0.01                   |       |       |
| <b><u>Cyanobacteria</u></b>           |                        |       |       |
| <i>Synechococcus CC9902</i>           |                        |       | 0.02  |
| <b><u>Epsilonbacteraeota</u></b>      |                        |       |       |
| <i>Arcobacter</i>                     | 2.22                   | 0.19  | 0.09  |
| <b><u>Firmicutes</u></b>              |                        |       |       |
| <i>Bacillus</i>                       | 0.21                   | 0.27  | 1.82  |
| <i>Oceanobacillus</i>                 |                        | 0.19  | 0.03  |
| <i>Sporosarcina</i>                   |                        |       | 0.37  |
| Unclassified <i>Carnobacteriaceae</i> |                        |       | 0.36  |
| <i>Vallitalea</i>                     | 0.01                   |       |       |
| <b><u>Proteobacteria</u></b>          |                        |       |       |
| <i>Brevundimonas</i>                  |                        | 0.15  |       |
| <i>Marteella</i>                      | 0.20                   | 5.66  | 0.05  |
| <i>Labrenzia</i>                      | 1.48                   | 24.67 | 0.07  |
| <i>Bradyrhizobium</i>                 |                        | 0.05  |       |
| <i>Nautella</i>                       | 0.02                   |       |       |
| Unclassified <i>Rhodobacteraceae</i>  | 0.01                   |       |       |
| <i>Tistrella</i>                      | 0.35                   |       |       |
| <i>Desulfofaba</i>                    | 0.02                   |       |       |
| <i>Halodesulfovibrio</i>              | 0.05                   |       |       |
| <i>Desulfuromusa</i>                  | 0.01                   |       |       |
| <i>Geoalkalibacter</i>                | 0.11                   | 0.17  |       |
| <i>Idiomarina</i>                     | 0.03                   |       |       |
| <i>Shewanella</i>                     | 10.91                  |       |       |
| <i>Achromobacter</i>                  | 0.06                   |       |       |
| <i>Ralstonia</i>                      |                        | 0.08  |       |
| <i>Enterobacter</i>                   | 3.39                   | 0.47  |       |
| <i>Escherichia-Shigella</i>           | 0.57                   | 2.67  | 0.08  |
| <i>Alcanivorax</i>                    | 6.46                   |       |       |
| <i>Chromohalobacter</i>               |                        |       | 0.73  |
| <i>Halomonas</i>                      | 1.91                   |       |       |
| <i>Salinicola</i>                     | 0.02                   |       |       |
| <i>Marinomonas</i>                    | 0.11                   | 18.49 |       |
| <i>Acinetobacter</i>                  | 0.01                   | 0.16  | 0.11  |
| <i>Alkanindiges</i>                   | 0.04                   |       |       |
| <i>Psychrobacter</i>                  |                        |       | 1.36  |
| <i>Pseudomonas</i>                    | 65.89                  | 46.73 | 94.91 |
| <i>Vibrio</i>                         | 5.87                   |       |       |
| <i>Stenotrophomonas</i>               |                        | 0.05  |       |

**Table S2.** Morphological characterisation of bacteria isolated from corroded seal rings

| Colony ID | Colony Colour  | Colony form | Colony elevation | Colony margin | Gram     | Morphology |
|-----------|----------------|-------------|------------------|---------------|----------|------------|
| CCC-APB1  | white          | circular    | raised           | entire        | negative | rod        |
| CCC-APB3  | pale yellow    | circular    | raised           | entire        | negative | rod        |
| CCC-APB5  | pale orange    | circular    | raised           | entire        | negative | rod        |
| CCC-SPP14 | white          | circular    | raised           | entire        | negative | rod        |
| CCC-SPP15 | black          | punctiform  | raised           | entire        | negative | rod        |
| CCC-IOB1  | brown          | circular    | raised           | entire        | negative | rod        |
| CCC-IOB3  | metallic brown | circular    | flat             | entire        | negative | rod        |
| CCC-IOB9  | orange         | punctiform  | raised           | entire        | negative | rod        |
| CCC-IOB10 | dark orange    | circular    | raised           | entire        | negative | rod        |

**Table S3.** Weight loss of coupons exposed to abiotic and biotic conditions for 7 days.

| Test      | Weight loss (mg) |          |          |
|-----------|------------------|----------|----------|
|           | Coupon 1         | Coupon 2 | Coupon 3 |
| Control   | 4.6              | 4.5      | 4.3      |
| CCC-APB1  | 4.4              | 6.5      | 5.8      |
| CCC-APB3  | 16.1             | 5.1      | 13.8     |
| CCC-APB5  | 10.6             | 11.8     | 10.6     |
| CCC-SPP14 | 27.4             | 44.1     | 20.1     |
| CCC-SPP15 | 3.9              | 4.6      | 3.1      |
| CCC-IOB1  | 14.1             | 22.1     | 17.2     |
| CCC-IOB3  | 2.4              | 1.6      | 2.8      |
| CCC-IOB9  | 9.7              | 5.7      | 11.8     |
| CCC-IOB10 | 14.0             | 5.1      | 7.9      |

**Table S4.** *p*-value calculated from the Kruskal-Wallis test applied to evaluate differences in the corrosion rates and pit depths among coupons exposed to the isolated bacteria and the control for 7 days.

| Test 1  | Test 2    | <i>p</i> value |              |
|---------|-----------|----------------|--------------|
|         |           | Corrosion rate | Pit depth    |
| Control | CCC-APB1  | 0.275          | <b>0.007</b> |
| Control | CCC-APB3  | <b>0.049</b>   | <b>0.007</b> |
| Control | CCC-APB5  | <b>0.049</b>   | <b>0.007</b> |
| Control | CCC-SPP14 | <b>0.049</b>   | <b>0.007</b> |
| Control | CCC-SPP15 | 0.275          | <b>0.008</b> |
| Control | CCC-IOB1  | <b>0.049</b>   | <b>0.007</b> |
| Control | CCC-IOB3  | <b>0.049</b>   | 0.212        |
| Control | CCC-IOB9  | <b>0.049</b>   | <b>0.007</b> |
| Control | CCC-IOB10 | <b>0.049</b>   | <b>0.008</b> |

*p* > 0.05 = not significant

**Table S5.** Classification of corrosion rates triggered by isolated bacteria

| ID        | Corrosion rate categorisation* | Maximum pitting rate Categorisation* |
|-----------|--------------------------------|--------------------------------------|
| CCC-APB1  | Moderate                       | High                                 |
| CCC-APB3  | Severe                         | Severe                               |
| CCC-APB5  | Severe                         | High                                 |
| CCC-SPP14 | Severe                         | Severe                               |
| CCC-SPP15 | Low                            | Severe                               |
| CCC-IOB1  | Severe                         | Severe                               |
| CCC-IOB3  | Low                            | Low                                  |
| CCC-IOB9  | Severe                         | Severe                               |
| CCC-IOB10 | Severe                         | Severe                               |

\*Categorization corresponds to the corrosion and pitting rate calculated after subtracting the corrosion and pitting rate measured in the abiotic control. Corrosion rate categories (mm/y) Low (< 0.025), Moderate (0.025-0.12), High (0.13-0.25), Severe (> 0.25). Pitting rate categories (mm/y) Low (< 0.13), Moderate (0.13-0.20), High (0.21-0.38), and Severe (> 0.38).

**Table S6.** Weight loss of coupons exposed to abiotic and biotic conditions for 21 days.

| Test      | Weight loss (mg) |          |          |
|-----------|------------------|----------|----------|
|           | Coupon 1         | Coupon 2 | Coupon 3 |
| Control   | 1.9              | 2.2      | 1.5      |
| CCC-IOB3  | 7.1              | 6.2      | 4.8      |
| CCC-SPP14 | 11.8             | 8.8      | 10.6     |
| CCC-APB5  | 7.6              | 7.7      | 6.3      |

**Table S7.** *p*-value calculated from the Kruskal-Wallis test applied to evaluate differences in the corrosion rates and pit depths among coupons exposed to the isolated bacteria and the control for 21 days.

| Test 1  | Test 2    | <i>p</i> value |              |
|---------|-----------|----------------|--------------|
|         |           | Corrosion rate | Pit depth    |
| Control | CCC-IOB3  | <b>0.049</b>   | <b>0.004</b> |
| Control | CCC-SPP14 | <b>0.049</b>   | <b>0.004</b> |
| Control | CCC-APB5  | <b>0.049</b>   | <b>0.004</b> |

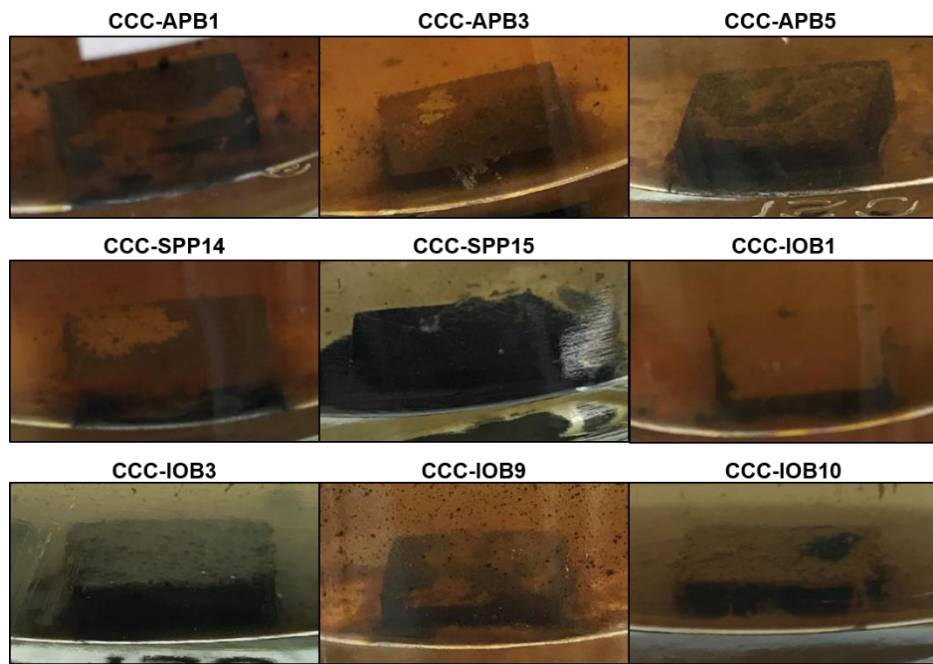

**Figure S1.** Images of the carbon steel coupons exposed for 7 days to the bacteria isolated from corroded seal rings.

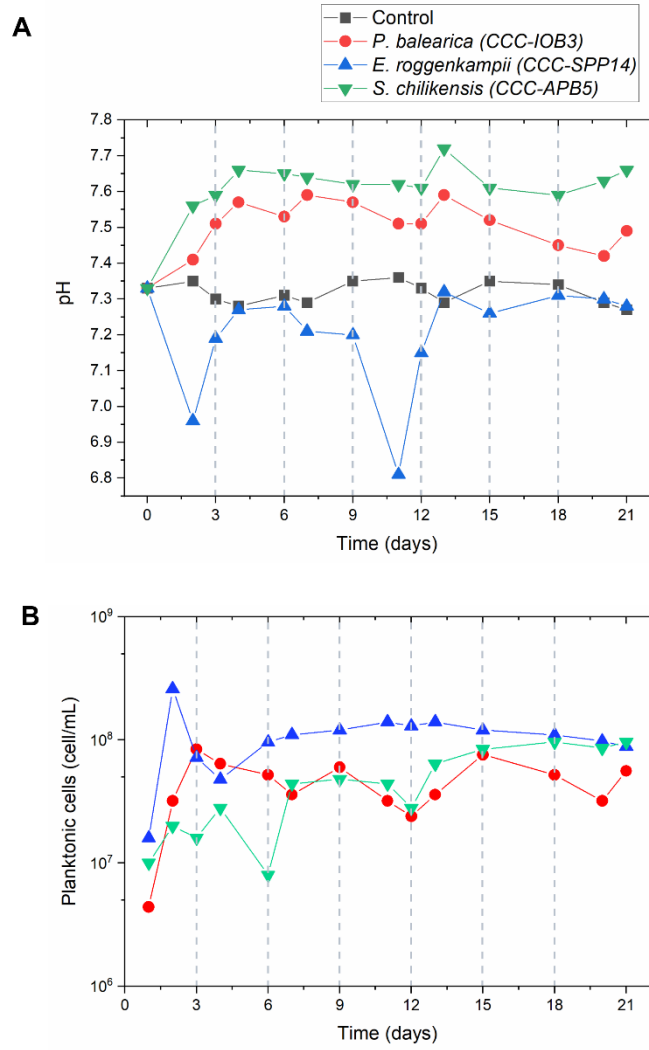

**Figure S2.** Test solution pH (A) and planktonic cell numbers (B) during the long term study. Replenishment of media is indicated by the dashed line. Figures generated using OriginPro version 2020 (OriginLab Corporation). <https://www.originlab.com/>
